# Supplementary material for: Ursodeoxycholic Acid Treatment–Induced GLOBE Score Changes Are Associated With Liver Transplantation-Free Survival in Patients With Primary Biliary Cholangitis
Source: PubMed Central journal article supplement — Am J Gastroenterol. 2022 Dec 14;118(7):1196–203. doi: 10.14309/ajg.0000000000002128 (PMC10298170; doi:10.14309/ajg.0000000000002128), 2022-12-14
Supplement: acg-118-1196-s001.pdf [file acg-118-1196-s001.pdf]

## SUPPLEMENTARY MATERIALS

**Table S1. Cox Proportional Hazards' Regression Analysis for LT or death**

|                                                           | Early disease <sup>a</sup><br>(n=2732) |         | Moderate/Advanced disease <sup>a</sup><br>(n=1043) |         | Below POISE criteria <sup>b</sup><br>(n=1071) |         | Abov    |
|-----------------------------------------------------------|----------------------------------------|---------|----------------------------------------------------|---------|-----------------------------------------------|---------|---------|
|                                                           | aHR (95%CI)                            | p-value | aHR (95%CI)                                        | p-value | aHR (95%CI)                                   | p-value | aHR (   |
| <b>Pre-treatment GLOBE score</b>                          | 2.69 (2.24-3.24)                       | 0.001   | 2.18 (1.85-2.57)                                   | <0.001  | 3.89 (2.66-5.69)                              | <0.001  | 2.56 (2 |
| <b><math>\Delta</math>GLOBE<sub>0-1</sub></b>             | 2.20 (1.57-3.07)                       | <0.001  | 2.31 (1.76-3.03)                                   | <0.001  | 2.67 (1.54-4.63)                              | <0.001  | 2.80 (2 |
| <b><math>\Delta</math>GLOBE<sub>0-1</sub><sup>2</sup></b> | 1.05 (1.004-1.10)                      | 0.034   | 1.13 (1.03-1.25)                                   | 0.012   | -                                             | -       | 1.19 (1 |

Abbreviations:  $\Delta$ GLOBE<sub>0-1</sub>, delta GLOBE during the first year of UDCA; HR, hazard ratio; CI, confidence interval; LT, liver transplantation.

Hazard ratio adjusted for gender, year of diagnosis, and baseline AST and ALT

<sup>a</sup> Biochemical disease stage according to Rotterdam criteria

<sup>b</sup> Below POISE was defined as ALP <1.67 xULN and bilirubin <1.0 xULN; Above POISE was defined as an ALP  $\geq$ 1.67 xULN or bilirubin >1.0 xULN.

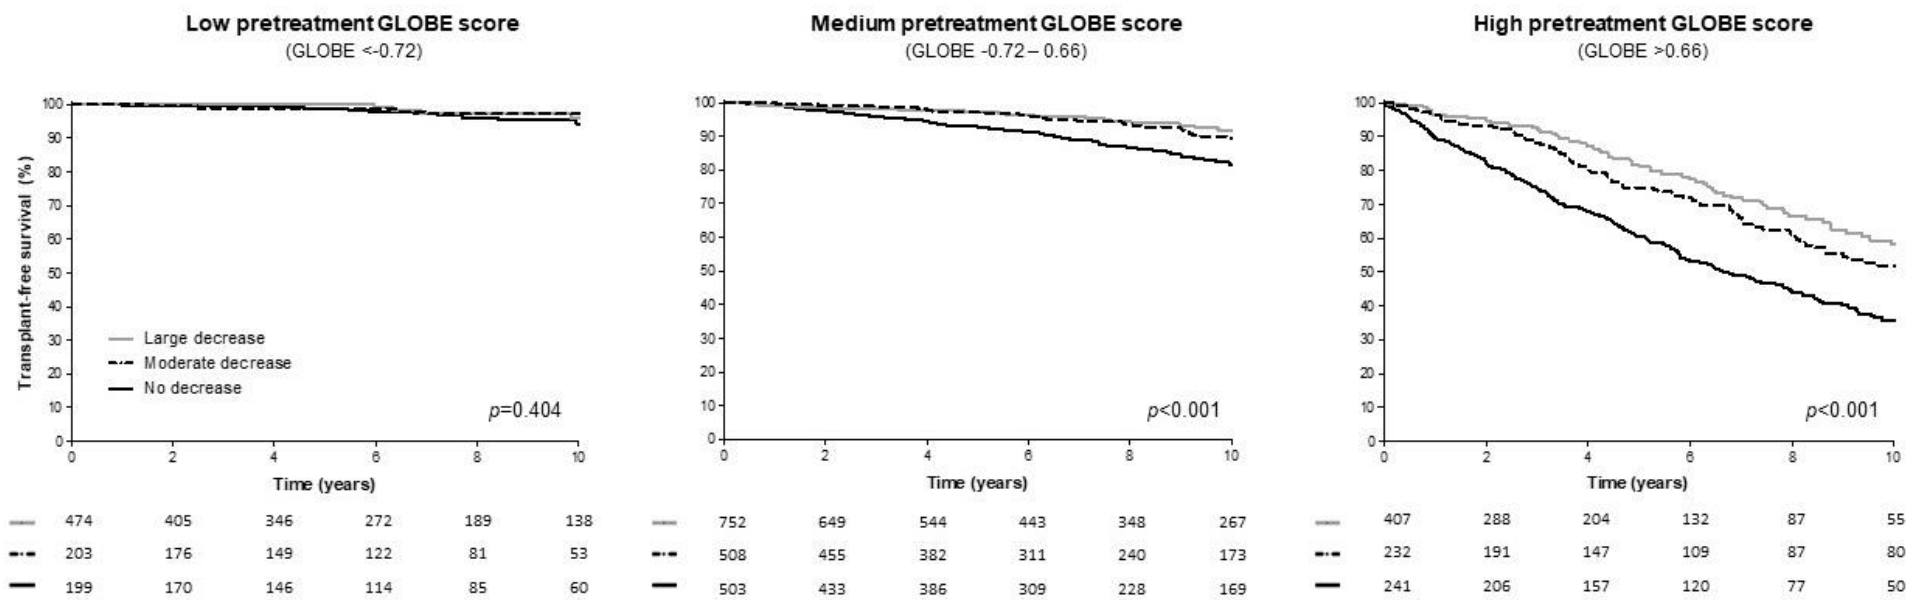

**Figure S1. Transplant-free survival in patients with a low, medium, and high pretreatment GLOBE score, stratified according to  $\Delta$ GLOBE<sub>1-2</sub> category.** A  $\Delta$ GLOBE<sub>1-2</sub>  $\geq 0$  was included in the group of no decrease. Patients with  $\Delta$ GLOBE<sub>1-2</sub>  $< 0$  were separated into 2 groups based on their median  $\Delta$ GLOBE<sub>1-2</sub> of -0.31 as cut-off. Patients with a  $\Delta$ GLOBE<sub>1-2</sub> between -0.31 and 0 were considered to have a moderate decrease, whereas patients with a  $\Delta$ GLOBE<sub>1-2</sub>  $< -0.31$  were considered to have a large decrease.
